# Supplementary material
Source: PubMed Central journal article supplement (PMC11421209)

# Raw blot data

Manuscript : ar-22-0171



# Fig 1F caspase-1, NLRP3 and beta actin

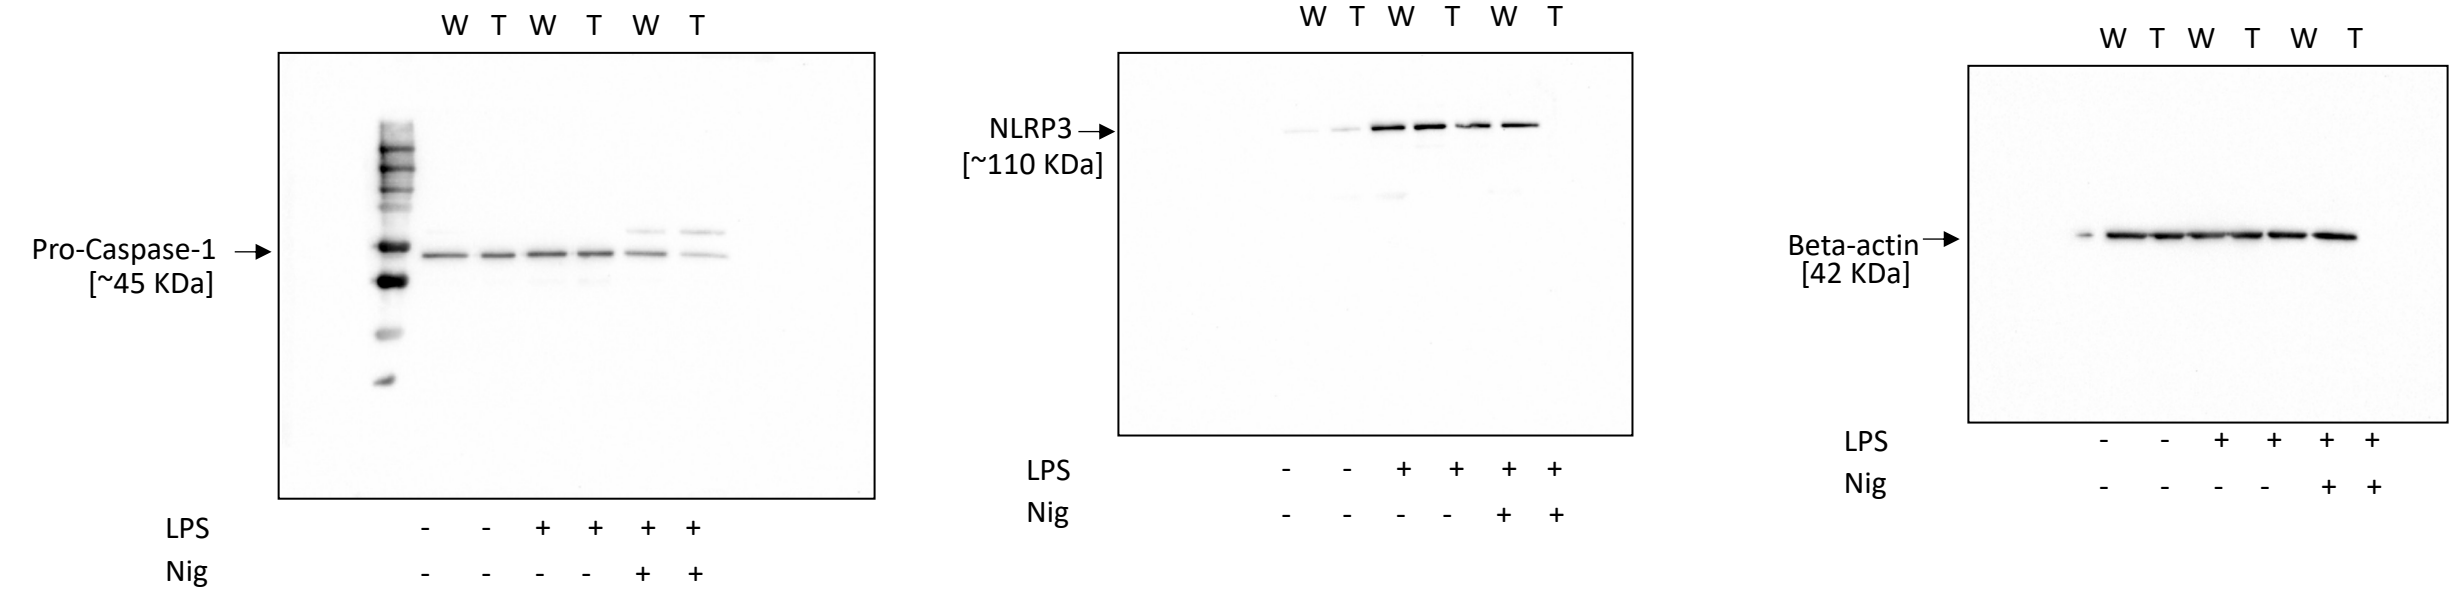

# Fig 1| GSDMD and cleaved GSDMD

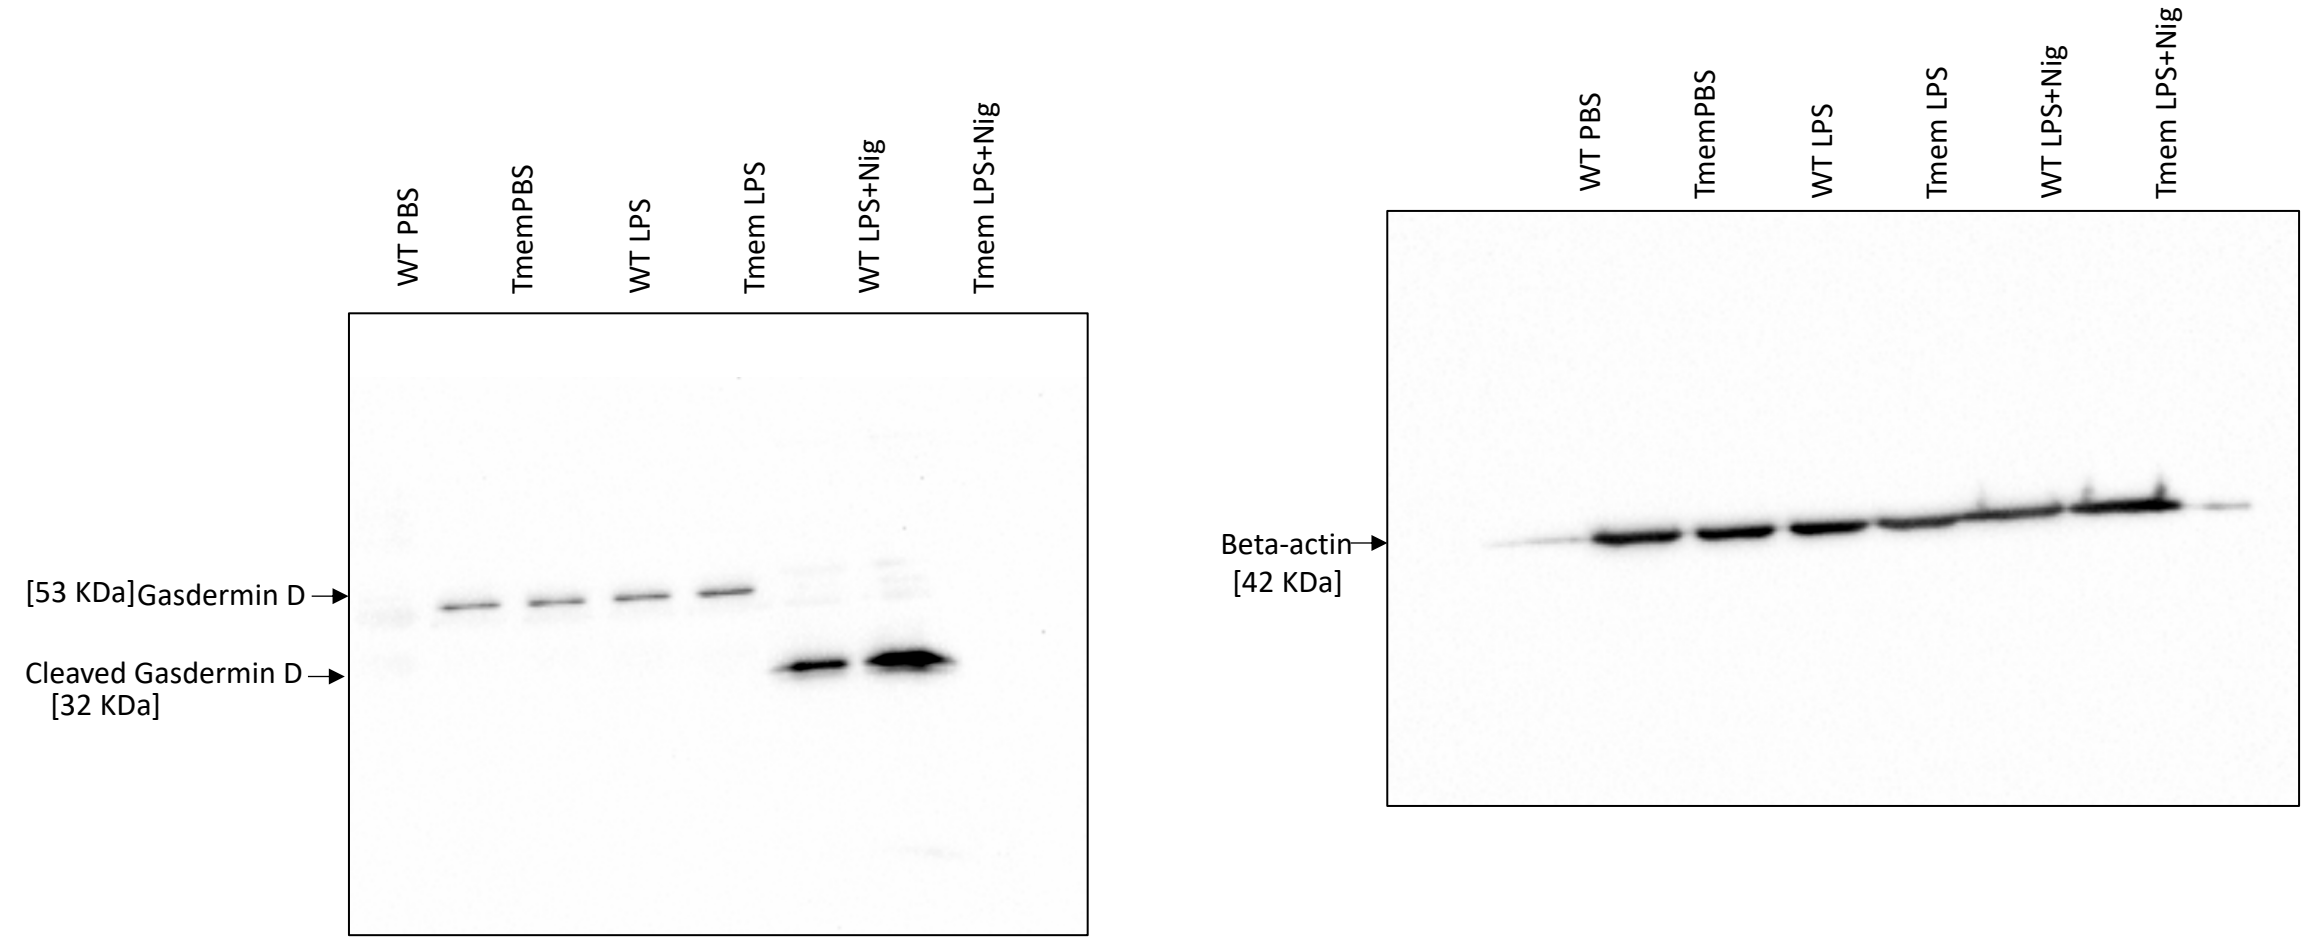

# Fig 2A Stim1, Pro-IL1beta, Pro-caspase-1, beta actin

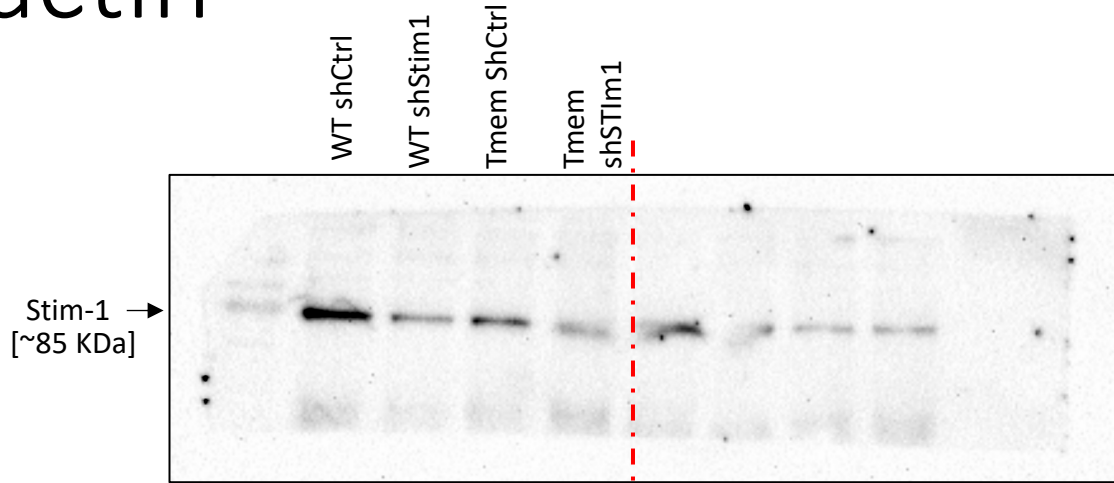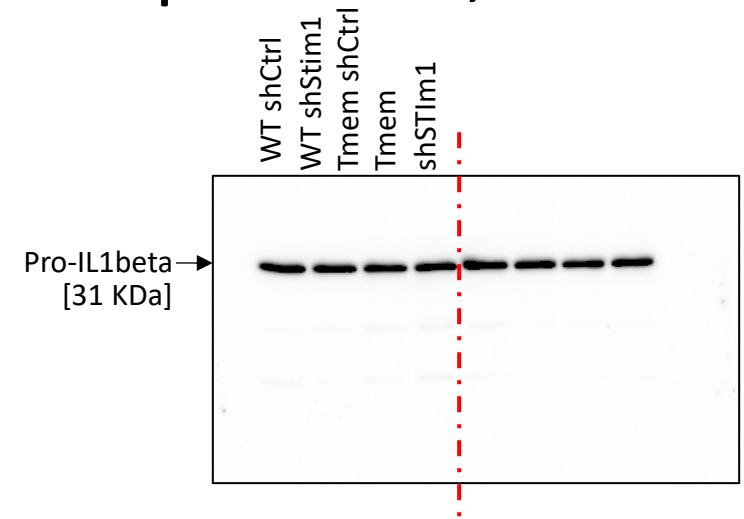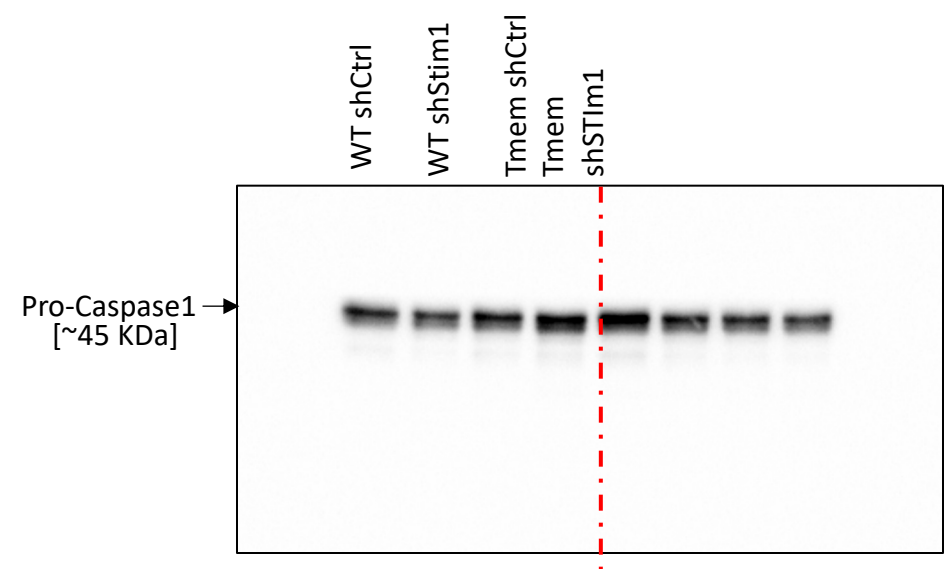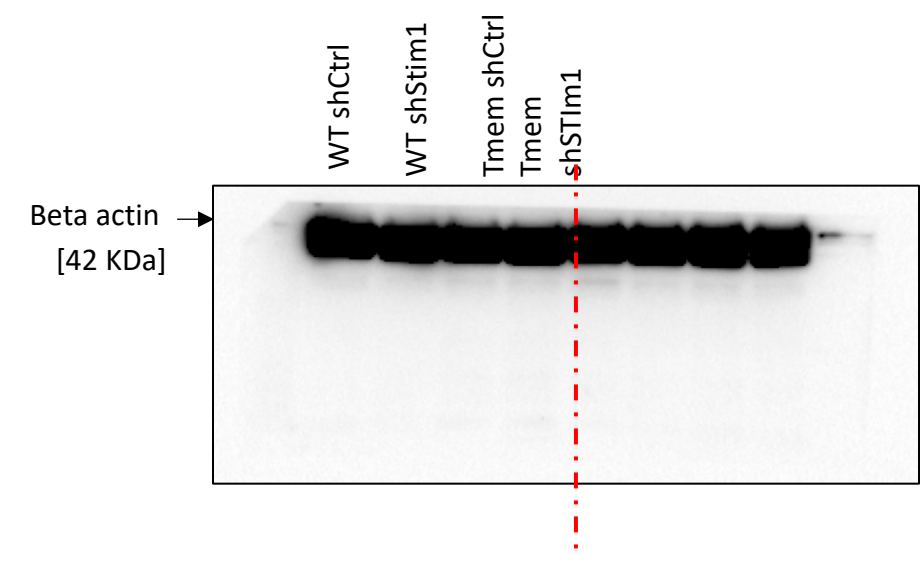

Fig 2E Tmem178HA, Beta actin

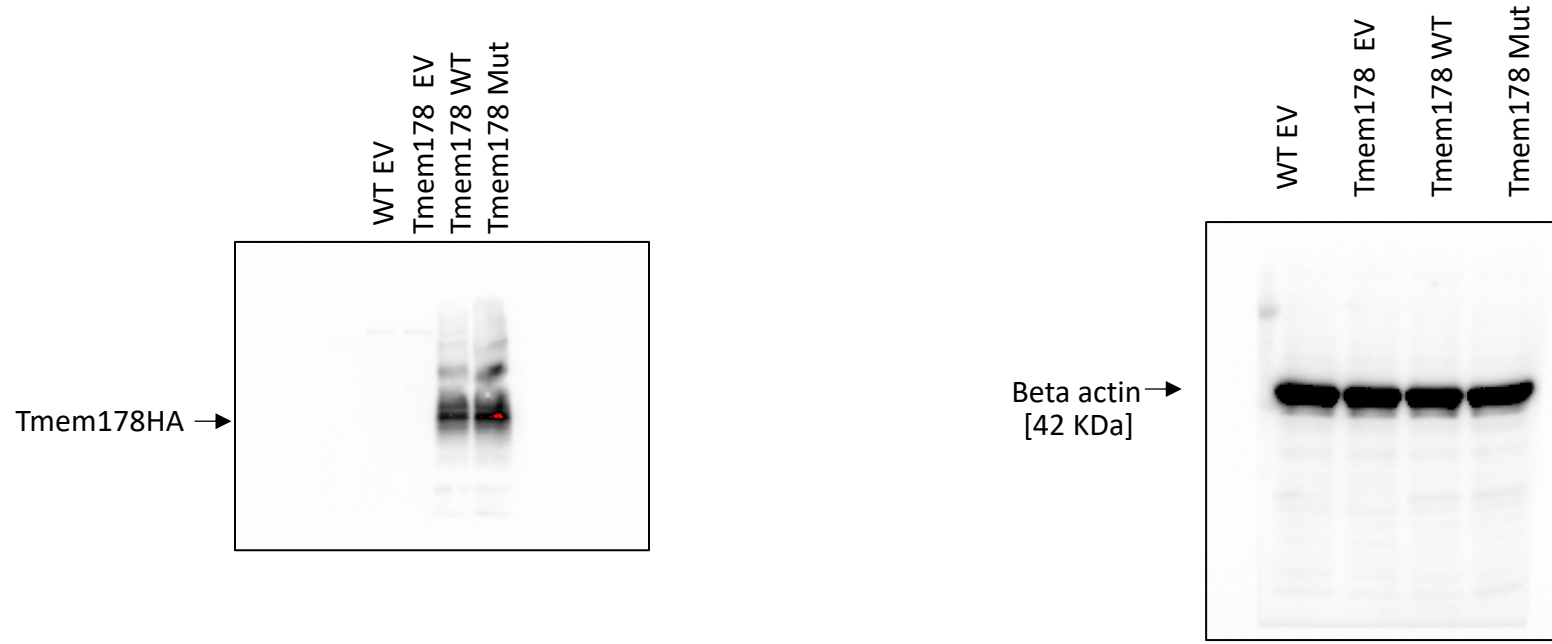

# Supplemental Fig 2A

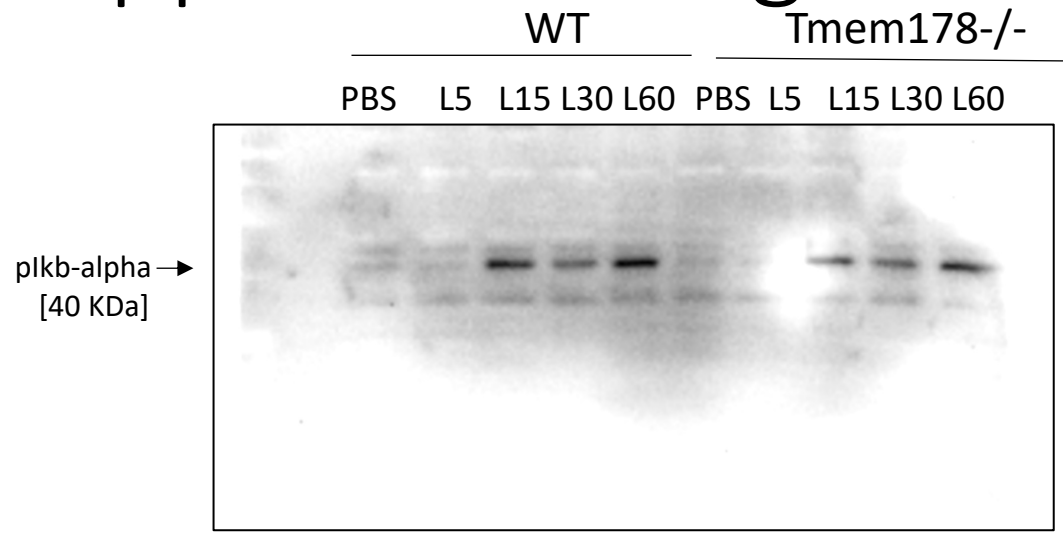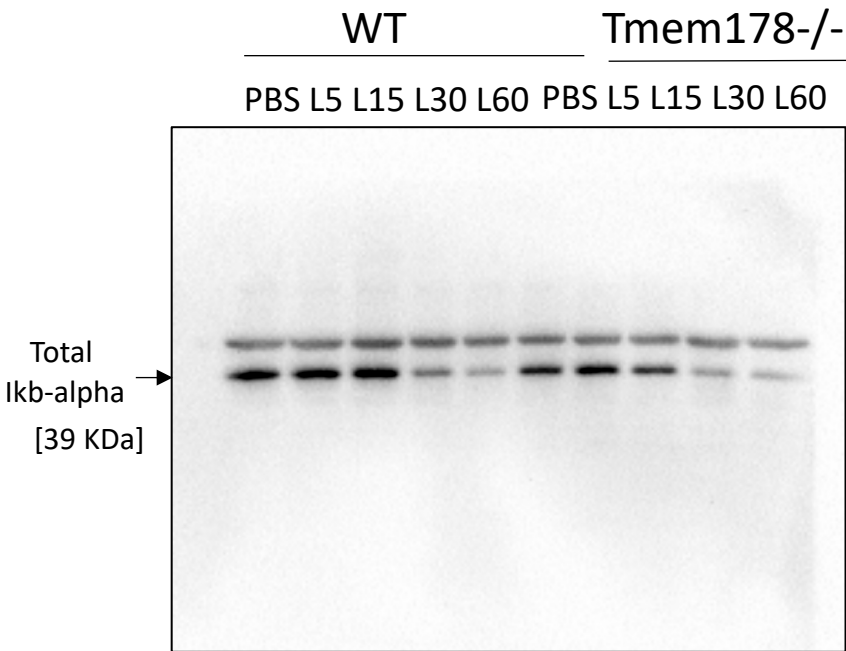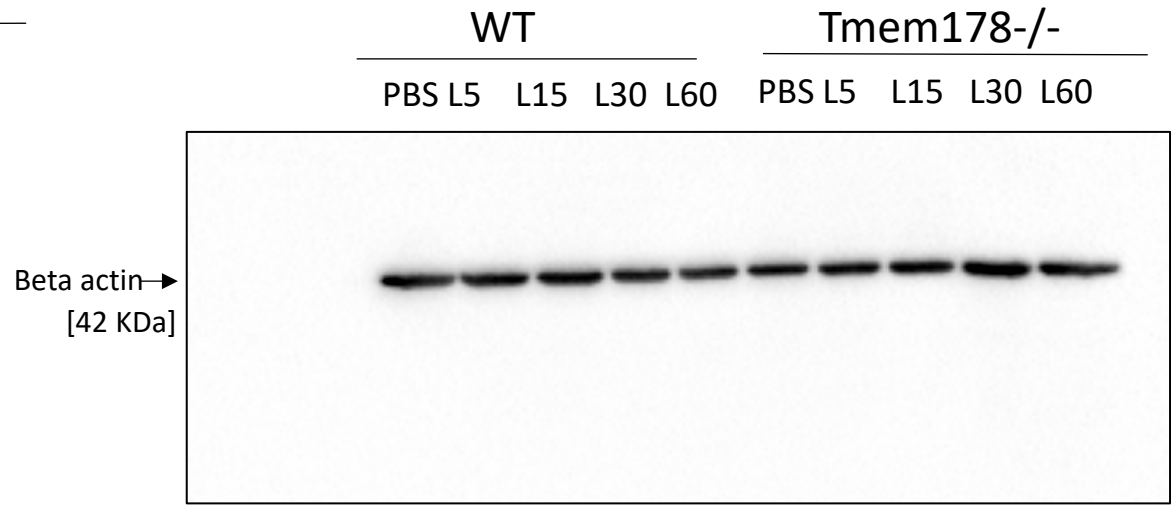

# Supplemental Fig 2E

WT

PBS LPS LPS LPS LPS LPS LPS LPS LPS  
5min 15min 30min 1hr 2hr 3hr 4hr 6hr

Pro-IL1beta  
[31 KDa]

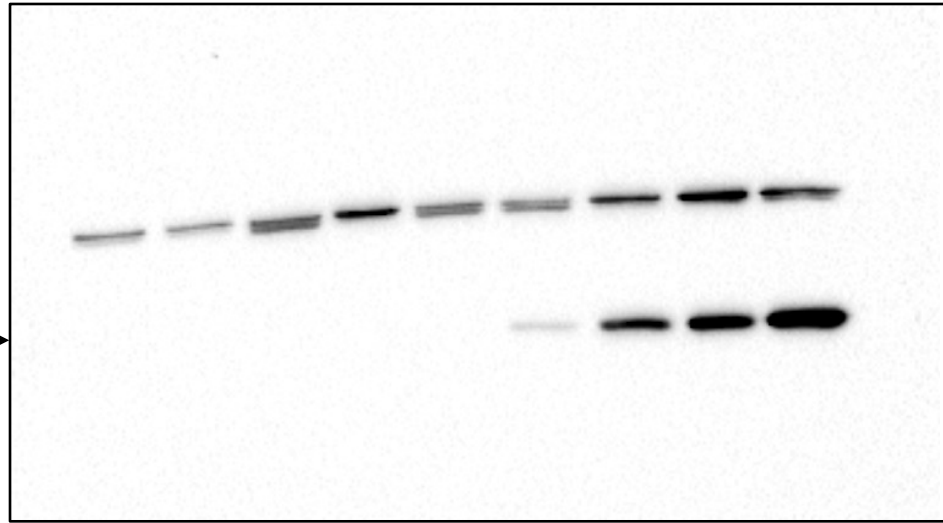

Beta actin  
[42 KDa]

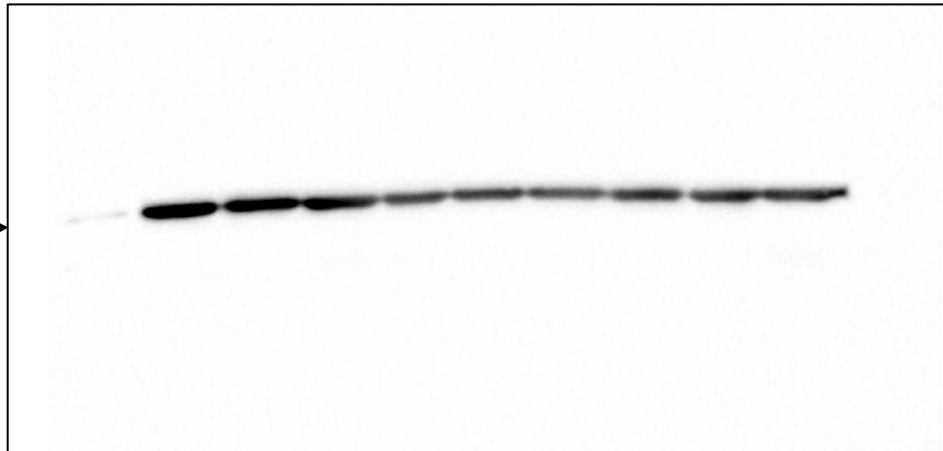

Tmem178<sup>-/-</sup>

PBS LPS LPS LPS LPS LPS LPS LPS LPS  
5min 15min 30min 1hr 2hr 3hr 4hr 6hr

Pro-IL1beta  
[31 KDa]

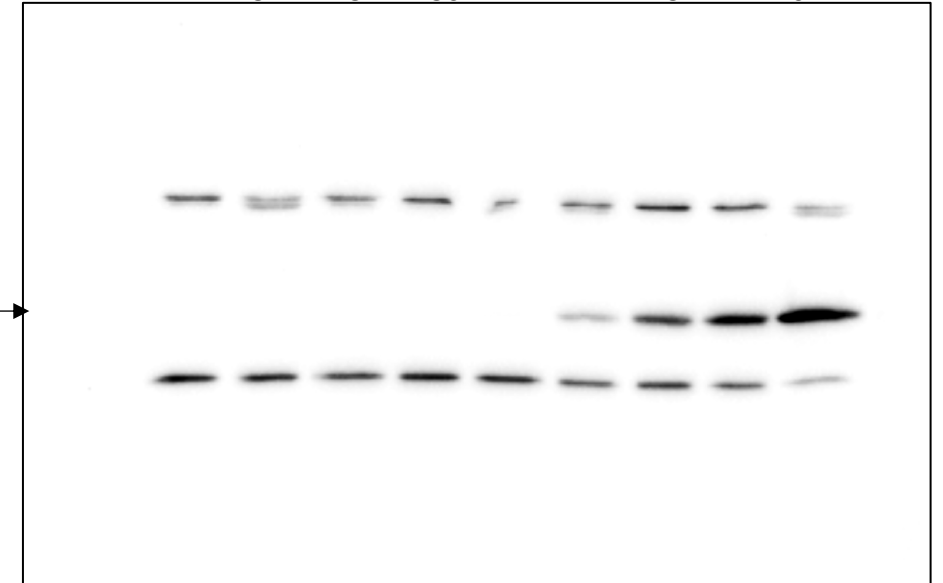

Beta actin  
[42 KDa]

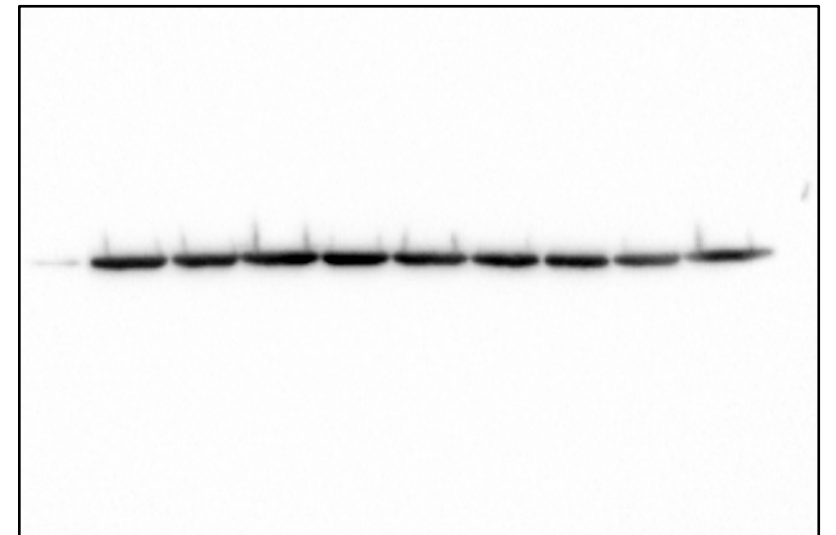

Supplement: NIHMS1938124-supplement-Supinfo1.pdf [file NIHMS1938124-supplement-Supinfo1.pdf]
